# Supplementary material for: Airway-resident memory CD4 T cell activation accelerates antigen presentation and T cell priming in draining lymph nodes
Source: JCI journal article supplement (doi:10.1172/jci.insight.182615), 2024-12-17
Supplement: sd1 [file 1]

A

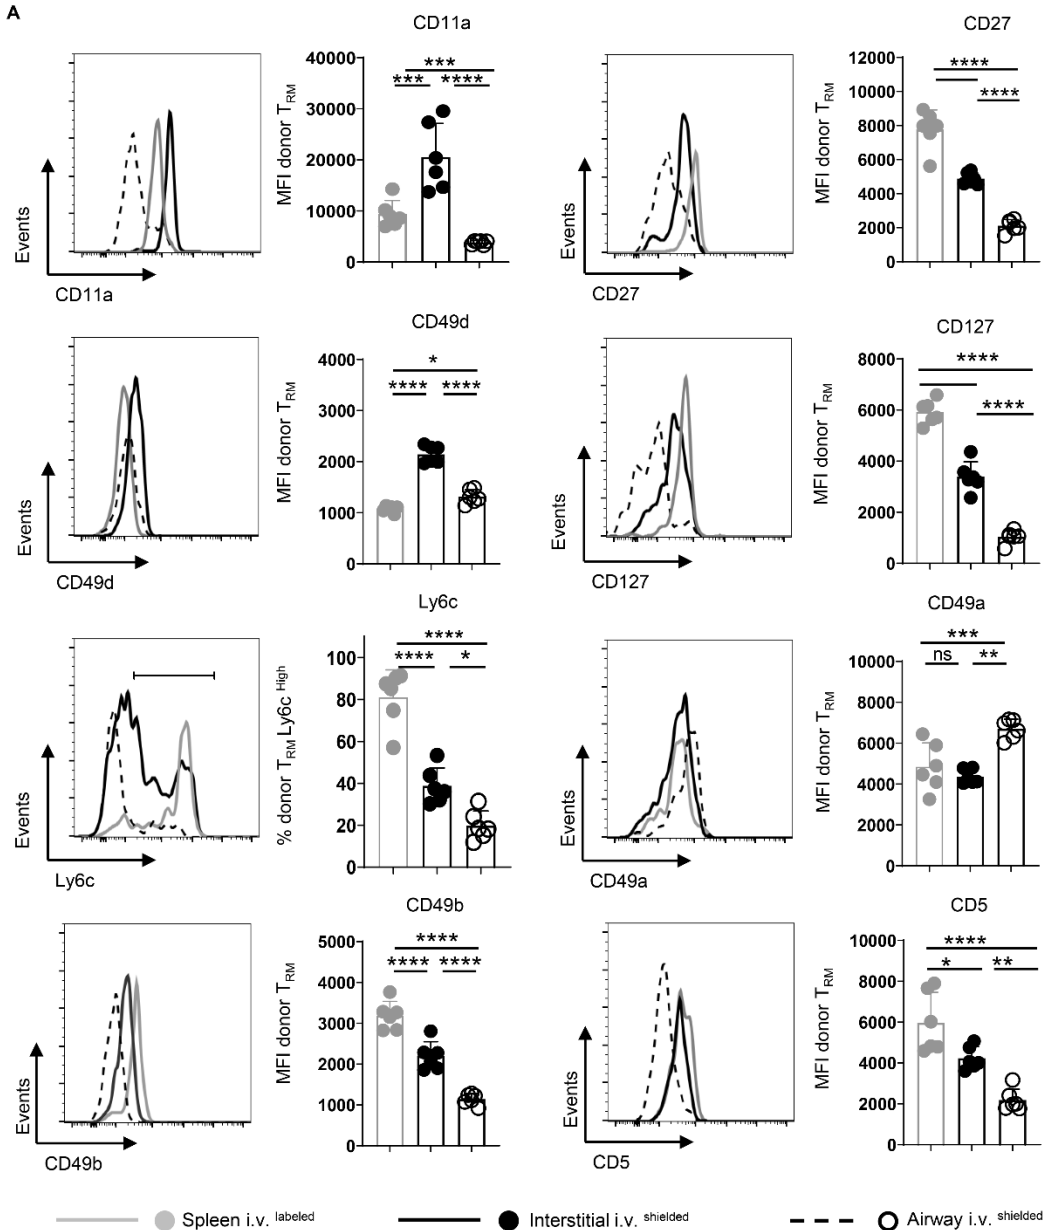

B

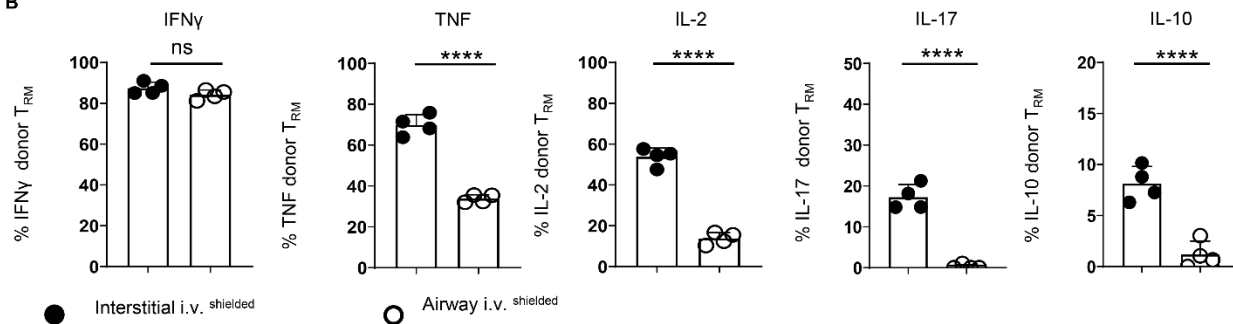

**Supplemental Figure 1:** *Airway and Interstitial  $T_{RM}$  are characterized by unique phenotypes and functional potential.* **(A)** Representative staining and summary analysis for stated marker expression by OT-II memory cells in IAV-primed mice at 45 dpi by splenic memory cells labeled with anti-CD4 antibody shortly before organ harvest (i.v.<sup>labeled</sup>), i.v.<sup>shielded</sup> cells from the lungs not recoverable by BAL, and i.v.<sup>shielded</sup> cells recovered by BAL. n=6/group; pooled from 2 individual experiments. **(B)** The frequency of interstitial and airway memory OT-II cells positive for stated cytokines after restimulation; n=4/group; 1 of 3 experiments. One-way ANOVA with Tukey's post-test used in (A) and Students t test used in (B).

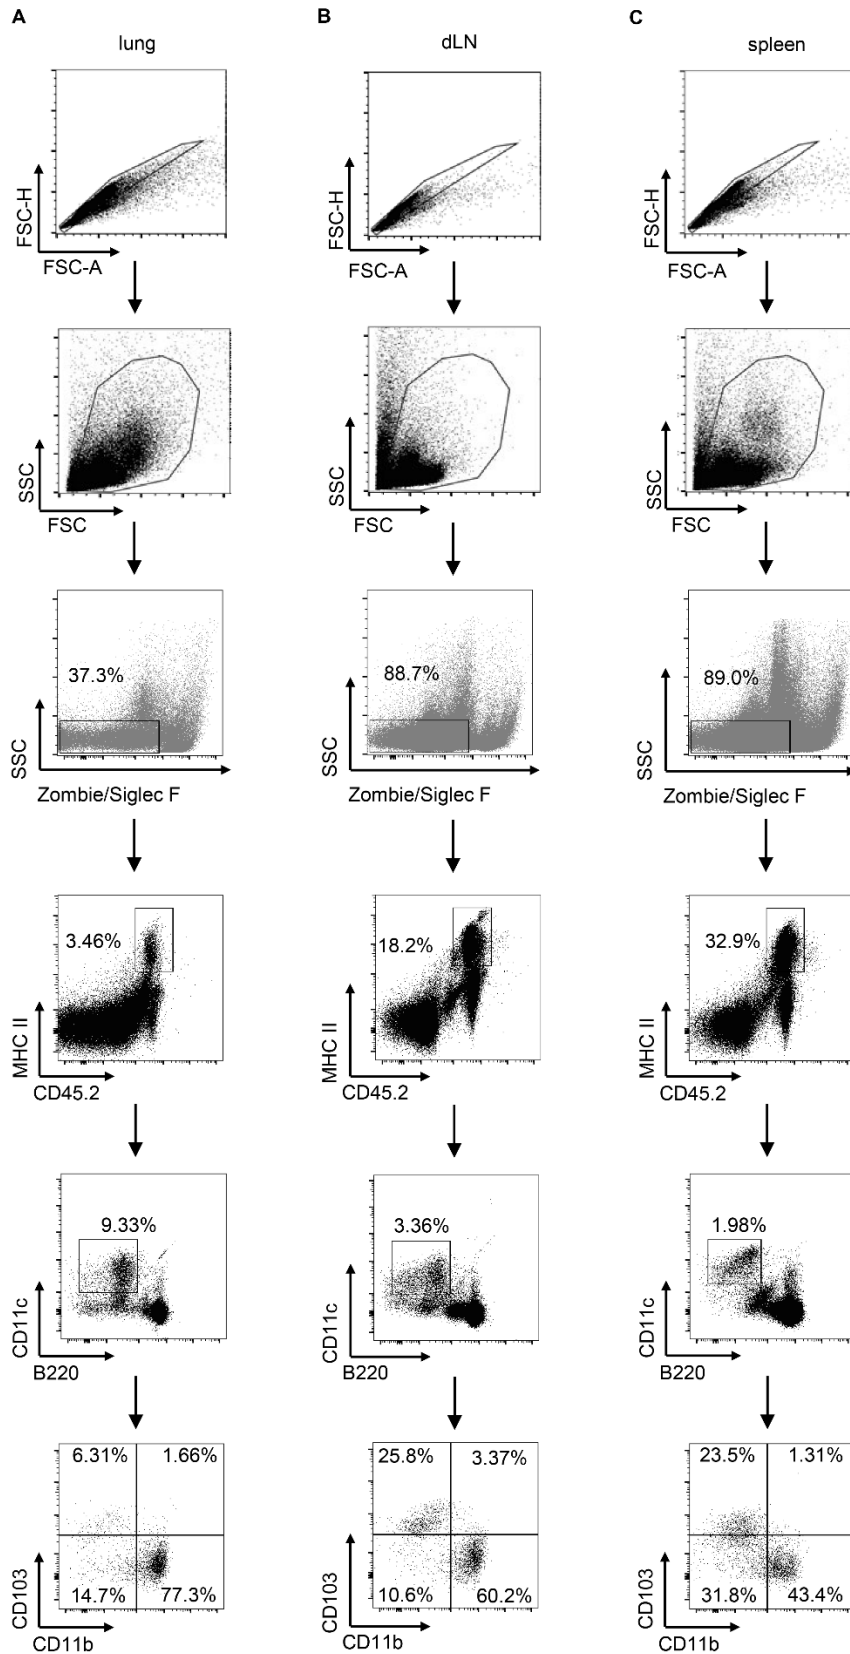

## Supplemental Figure 2:

*Representative staining of gating strategies for FACS identification of DC in lung (A), dLN (B) and spleen (C). Mice were primed with PR8-OVA<sub>II</sub> and challenged 45 dpi i.n. with 50 ug of FITC-OVA. Organs were harvested at 1 day post OVA installation.*

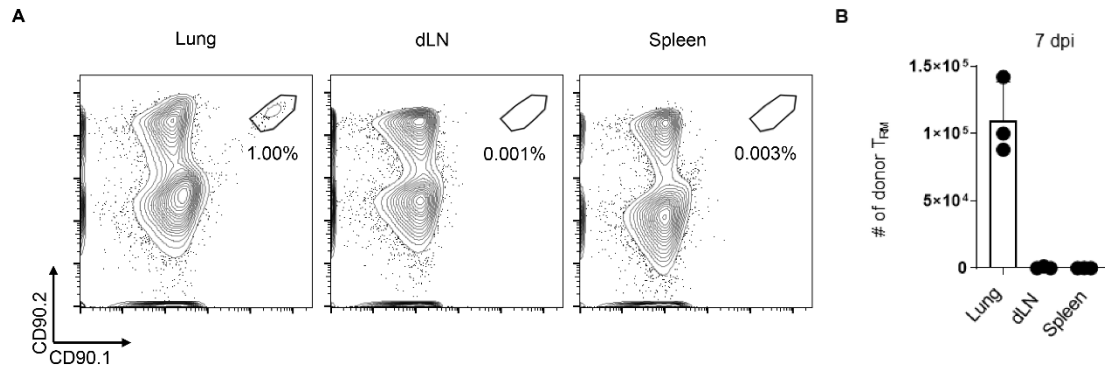

**Supplemental Figure 3:** *IAV-primed CD4  $T_{RM}$  respond locally against IAV in adoptive hosts.* CD90.2<sup>+</sup>CD90.1<sup>+</sup> OT-II memory cells were isolated from the lungs of PR8-OVA<sub>II</sub>-primed mice at 26 dpi and  $1 \times 10^6$  were transferred i.n. to new unprimed B6 mice. The mice were then challenged with a sublethal dose of PR8-OVA<sub>II</sub>. Shown is representative staining to identify donor memory-derived cells at 7 dpi in stated organs (**A**) and the number of donor cells detected in individual mice (**B**); n = 3 mice; results from 1 of 2 experiments.

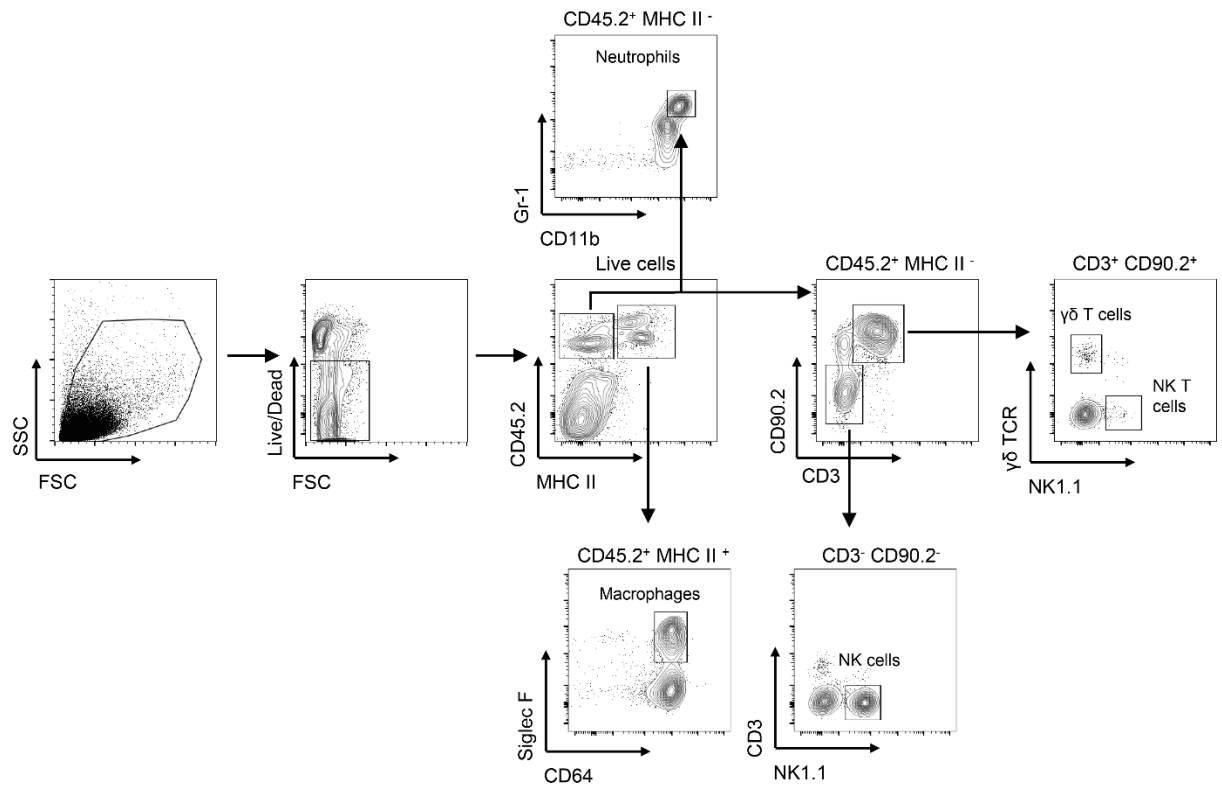

**Supplemental Figure 4:** *Representative staining of gating strategies used to identify innate cells populations in the lungs summarized in Figure 4F.*
